# Supplementary material for: Exploration and modulation of the photophysical properties of bromelain in a bioamphiphilic micellar system: comparative studies on the basis of room temperature ionic liquids, anionic surfactants, drugs and salts
Source: Royal Society of Chemistry journal article supplement (doi:10.1039/d4nj01363h), 2024-01-01
Supplement: d4nj01363h1.pdf [file d4nj01363h1.pdf]

## Supporting Information

### Modulate Exploration of the Photophysical Properties of Bromelain in Bioamphiphilic Micellar System: An Approach of Comparative studies in the presence of Room Temperature Ionic Liquids, Anionic Surfactant, Drug and Salt

Apensu Dey, Sudipta Chakraborty and Soumen Ghosh\*

Centre for Surface Science, Physical Chemistry Section, Department of Chemistry, Jadavpur University, Kolkata-700 032, India; E-mail: [gsoumen70@hotmail.com](mailto:gsoumen70@hotmail.com)

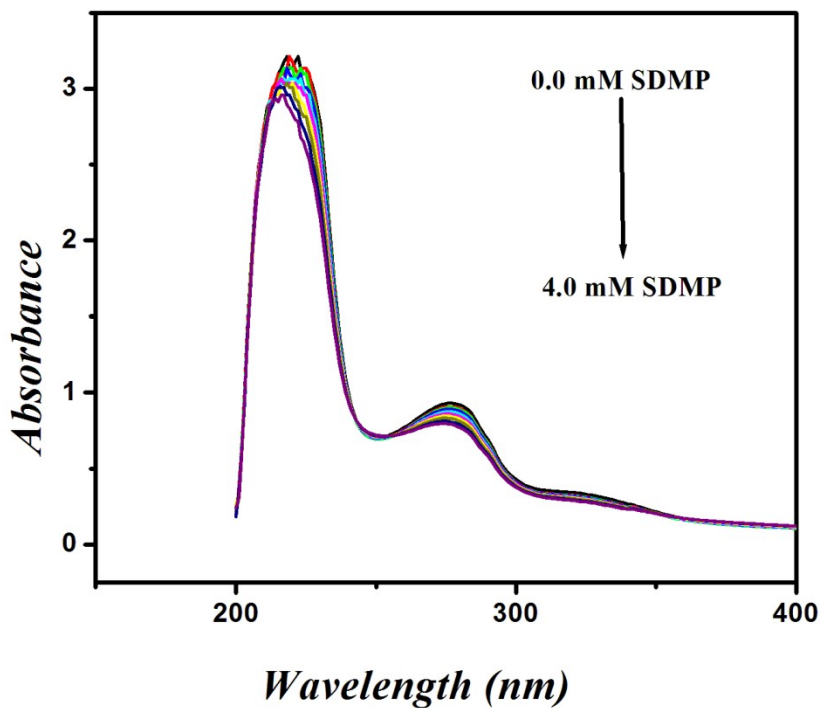

Fig. s1. Absorption spectra of bromelain with increasing concentration of SDMP focusing to the wavelength 215-225 nm at 298 K.

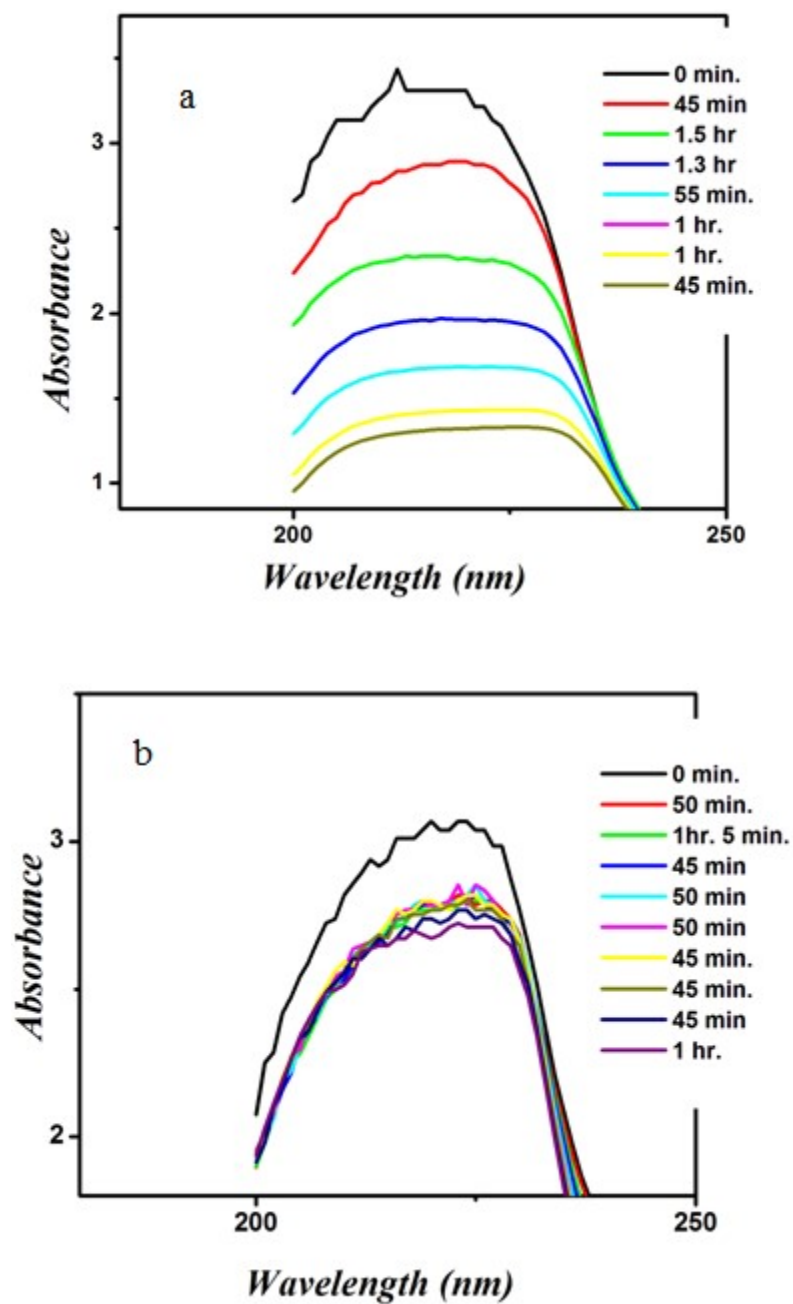

Fig. s2. Time-dependent absorption spectra of bromelain in SDMP micelle (a) in the absence and (b) presence of  $C_{16}MeImCl$ .

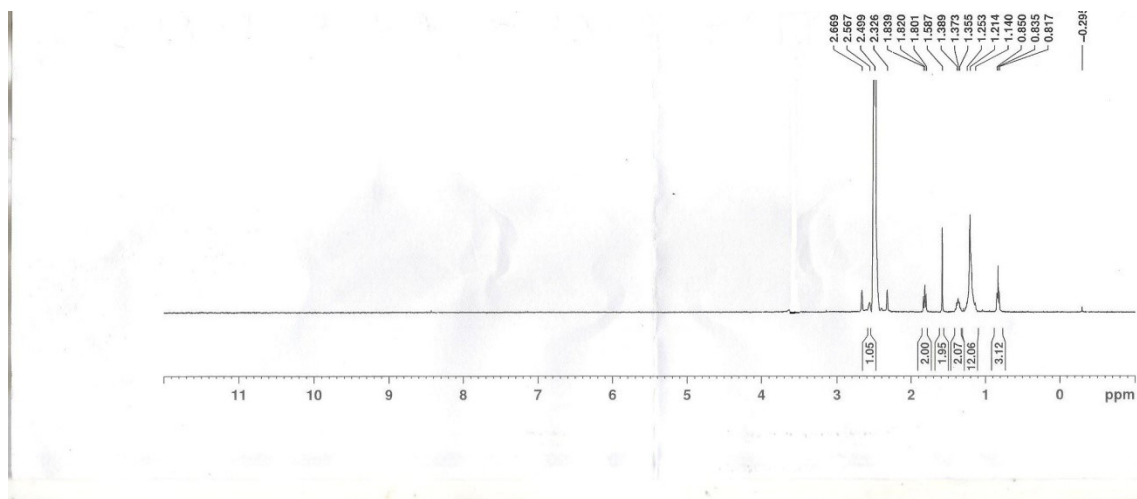

Fig. s3. <sup>1</sup>H NMR of SDMP
